# Supplementary material for: Anthropogenic influences on the physical state of submicron particulate matter over a tropical forest
Source: Copernicus journal article supplement (doi:10.5194/acp-17-1759-2017), 2017-02-06
Supplement: Supplementary file 1 [file acp-17-1759-2017-supplement.zip]

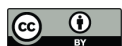

*Supplement of*

## **Anthropogenic influences on the physical state of submicron particulate matter over a tropical forest**

**Adam P. Bateman et al.**

*Correspondence to:* Scot T. Martin ([scot\\_martin@harvard.edu](mailto:scot_martin@harvard.edu))

- [acp-17-1759-2017-supplement-title-page.pdf](#)
- [All\\_data\\_Iop1.txt](#)
- [All\\_data\\_Iop2.txt](#)
- [Bateman\\_GoAmazon\\_v15\\_Supp\\_Submit.pdf](#)

The copyright of individual parts of the supplement might differ from the CC-BY 3.0 licence.
